# Supplementary material for: Polypyrrole-modified CuS nanoprisms for efficient near-infrared photothermal therapy
Source: Royal Society of Chemistry journal article supplement (doi:10.1039/c6ra28228h), 2017-01-01

**Supporting Information:**

**Polypyrrole-Modified CuS Nanoprisms for Efficient Near-Infrared  
Photothermal Therapy**

*Ruiyang Zhao<sup>b</sup>, Xiaoxia Sun<sup>a</sup>, Jing Sun<sup>a</sup>, Lei Wang<sup>a</sup>, Jishu Han<sup>\*a</sup>*

*<sup>a</sup> Key Laboratory of Eco-chemical Engineering, Ministry of Education, College of Chemistry and Molecular Engineering, Qingdao University of Science and Technology, Qingdao 266042, P.R.China. <sup>b</sup> College of Chemical Engineering, Qingdao University of Science and Technology, Qingdao 266042, P.R.China. E-mail: [jishu\\_han@163.com](mailto:jishu_han@163.com); Fax: +86 53284023927; Tel: +86 53284022681.*

**Fig. S1** TEM images of CuS nanomaterials synthesized through seed-mediated process. (a) CuS seeds, (b) first growth, (c) third growth.

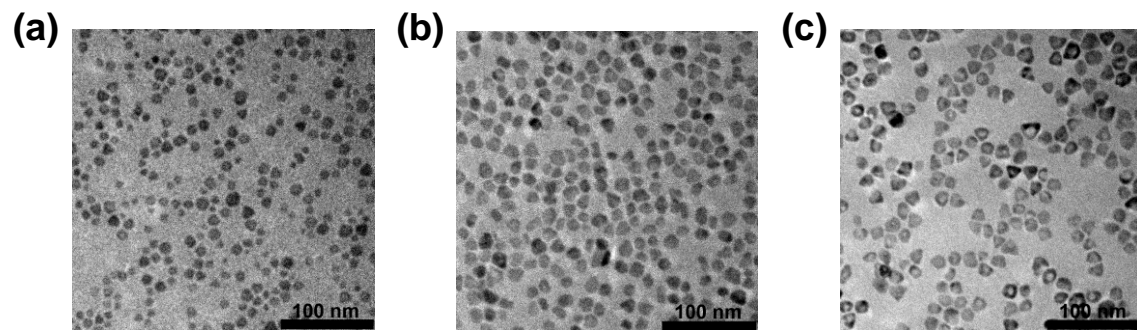

**Fig. S2** XRD pattern of CuS-PPy nanoprisms.

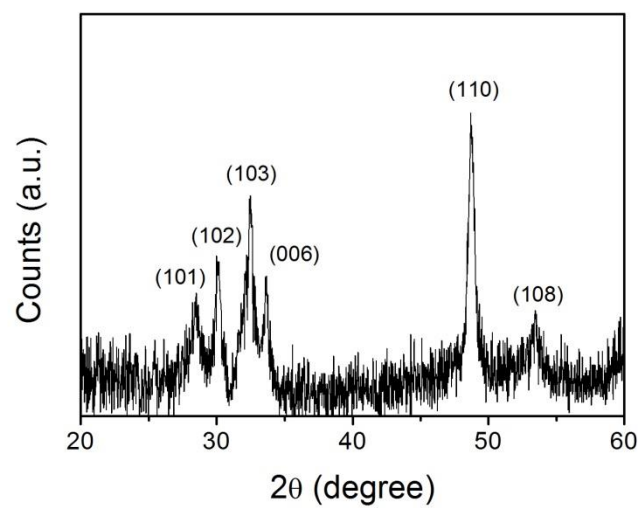

**Fig. S3** Photographs of CuS-PPy nanoprisms and SDS-capped CuS nanoprisms in water, saline and PBS solution for 7 days.

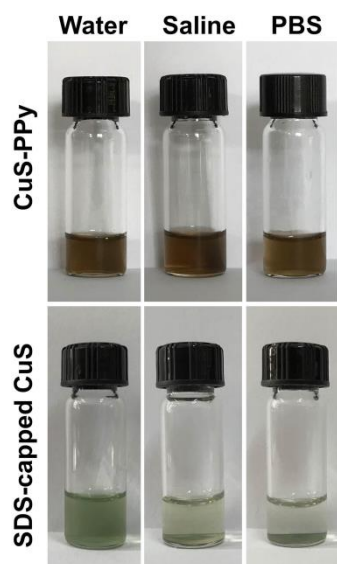

**Fig. S4** (a) Temperature elevation of CuS-PPy nanoprisms during five cycles of on-and-off laser irradiation (1064 nm, LASER ON time: 6.5 min, LASER OFF time: 8.5 min). (b) UV-vis-NIR spectra of CuS-PPy nanoprisms before and after five cycles of laser irradiation.

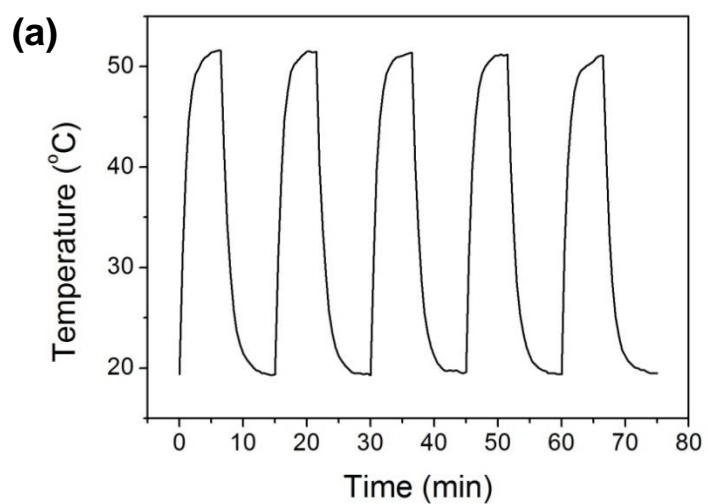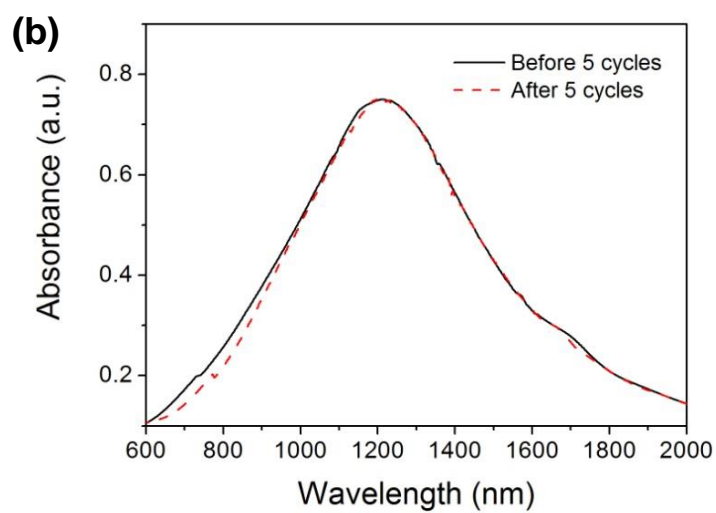

**Fig. S5** Cytotoxicity of SDS-capped CuS nanoprisms with different concentrations by MTT assay. Data are shown as the means  $\pm$  standard error of the means, \* $p < 0.05$ .

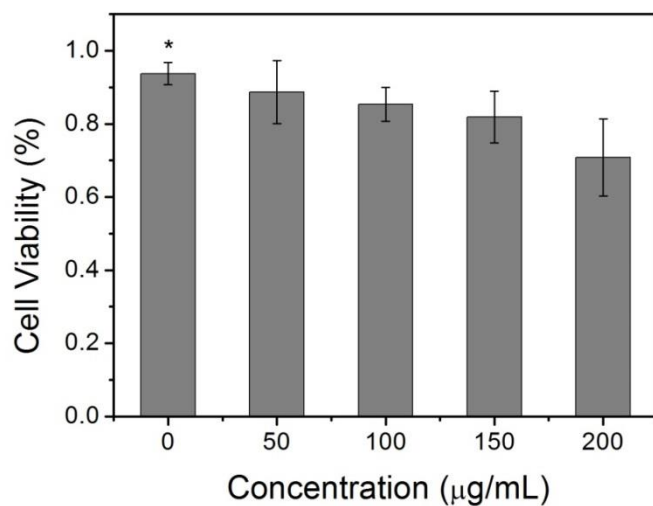

**Fig. S6** The temperature rise profiles at the tumor site over 6 min laser irradiation with CuS-PPy or PBS only.

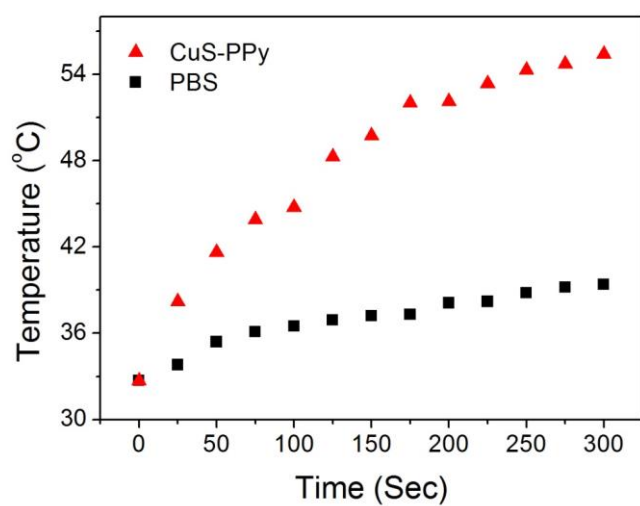

Supplement: c6ra28228h1.pdf [file c6ra28228h1.pdf]
